# Supplementary material
Source: MDPI journal article supplement (https://www.mdpi.com/1996-1073/11/10/2856)
Supplement: s1 [file s1]

# Supplementary Materials: Coupling Analysis and Performance Study of Commercial 18650 Lithium-Ion Batteries under Conditions of Temperature and Vibration

Lijun Zhang \*, Zhongqiang Mu and Xiangyu Gao

National Center for Materials Service Safety, University of Science and Technology Beijing, Beijing 100083, China; s20161186@xs.ustb.edu.cn (Z.M.); g20178978@xs.ustb.edu.cn (X.G.)

\* Correspondence: ljzhang@ustb.edu.cn; Tel.: +86-10-6232-1017

## 1. Test Incubator for Controlling Temperature

An Indelb T12R test incubator (Indelb, Zhongshan, China) is used for controlling temperature in this paper. By heating generation with a resistance and cooling with a DC compressor refrigeration, it can provide a temperature range of 55 °C to −18 °C, which can simulate the high and low temperature environmental conditions in the actual operation of the battery. The Indelb T12R test incubator is shown in Figure S1. The relevant technical specification is shown in Table S1.

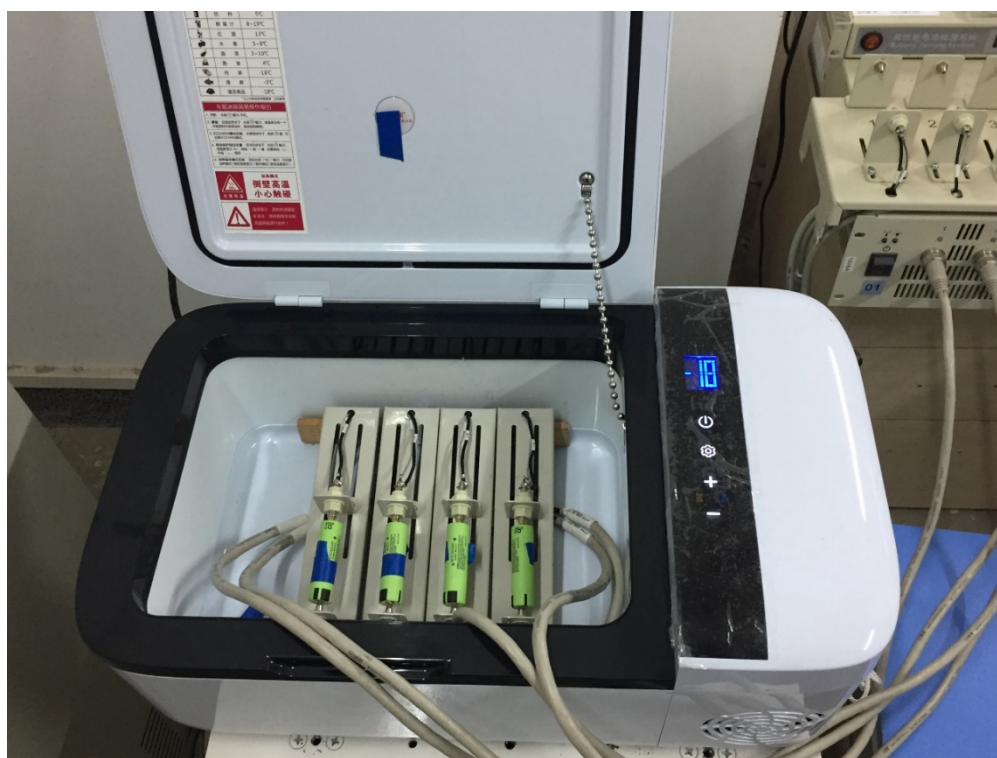

Figure S1. Indelb T12R test incubator.

In order to study the battery temperature performance, it is considered to divide the ambient temperature into five temperature gradients for experimental research. That is, (1) Low temperature icing environment: −15 °C to −10 °C, which is recorded as a temperature gradient *L*; (2) Low-normal temperature environment: 0 °C to 5 °C, recorded as temperature gradient *LN*; (3) Normal temperature environment: 15 °C to 20 °C, recorded as temperature gradient *N*; (4) Normal high temperature environment: 30 °C to 35 °C, recorded as temperature gradient *NH*; (5) High temperature environment: 45 °C to 50 °C, recorded as temperature gradient *H*.

**Table S1.** The specifications of the Indelb T12R.

| Performance Index     | Specifications                             |
|-----------------------|--------------------------------------------|
| Heating range         | 25 °C to 55 °C                             |
| Heating work mode     | Resistance heating                         |
| Cooling range         | 10 °C to −18 °C                            |
| Cooling work mode     | DC compressor                              |
| Heating/cooling power | 60 W / 55 W                                |
| Capacity/size         | 12 L, 354×250×155 (mm) effective workspace |

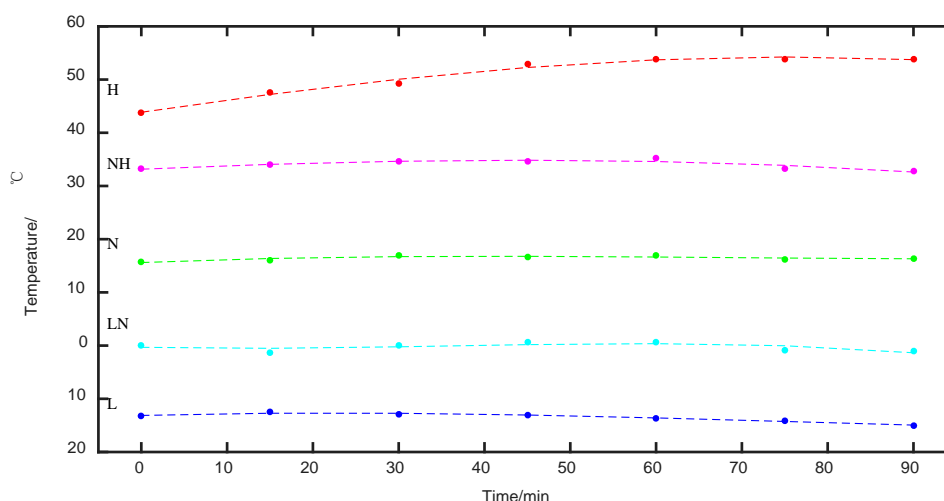**Figure S2.** The five temperature gradient.

As shown in Figure S2, the test was carried out in five gradients in the experiment. The scatter plot is the temperature value recorded by the high precision HT-9815 industrial digital display thermocouple thermometer (XINTEST, Beijing, China), and the fitted temperature profile.

## 2. Vibration Test Bench

A ZD/LX-XTP-VT700 test bench (Huayi Technology, Shanghai, China) which features fully automatic six-degree space electromagnetic absorption bench, which is composed of an electric vibration table, a power amplification unit, an acceleration sensing unit and a vibration control unit. The vibration control unit dynamically adjusts the power amplification unit through the signal fed back by the acceleration sensor to control the vibration parameter of the electric vibration table. Sinusoidal vibration, random vibration, fixed-frequency vibration, sweeping vibration, etc. are generated in three directions of X/Y/Z. The vibration test bench is shown in Figure S3, and the related technical specifications are shown in Table S2.

**Table S2.** The specifications of the vibration test bench.

| Performance Index    | Specifications                                      |
|----------------------|-----------------------------------------------------|
| Frequency range      | 1 Hz ~ 600 Hz                                       |
| Amplitude            | 0 ~ 5 mm (adjustable range mmp-p)                   |
| Maximum acceleration | 20 g                                                |
| Vibration direction  | Vertical + horizontal + front and rear              |
| Vibration waveform   | Sinusoidal, random, fixed-frequency, sweeping, etc. |

The standard SAEJ2380 is based on the actual measured random vibration curve of an electric car driving 100,000 miles, so it is more suitable for battery vibration testing. The standard SAEJ2380 can better reflect the actual vibration of lithium-ion batteries for vehicles, so this article refers to the SAEJ2380 standard. The vibration test conditions in the vertical, longitudinal and lateral directions are shown in the Table3.

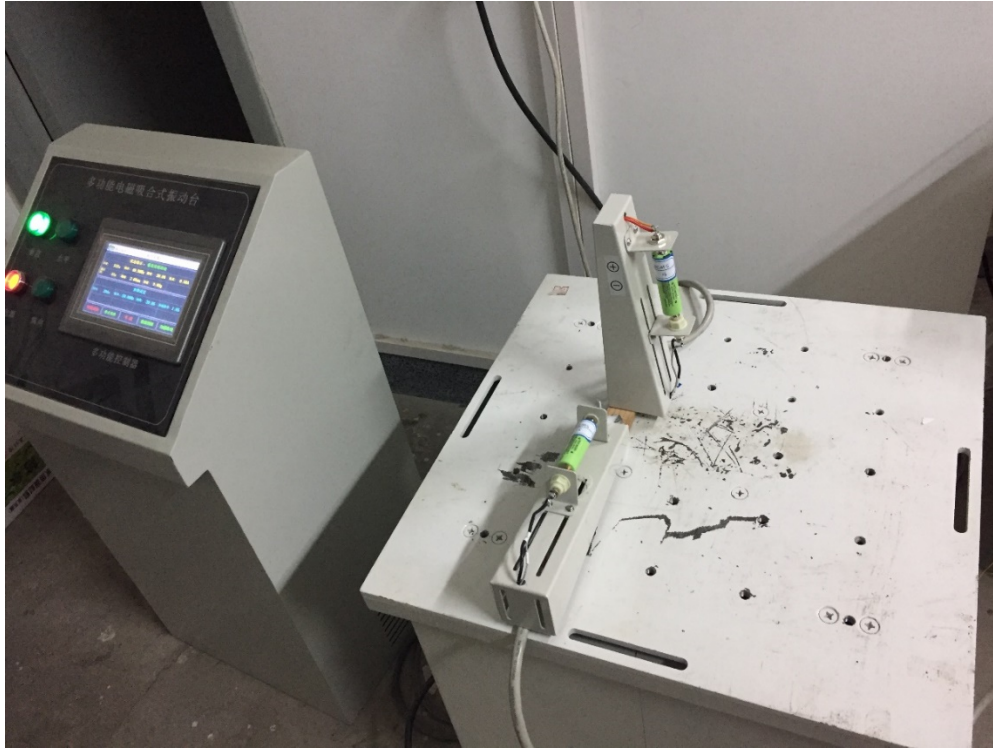

Figure S3. The vibration test bench.

Table S3. The test schedule of vibration.

| Test Conditions<br>Vibration Spectrum | Test Conditions<br>SOC (%) | Alternative Test<br>Acceleration<br>(G rms) | Alternative Test<br>Time (h) | Alternative Test<br>Cumulative Time (h) |
|---------------------------------------|----------------------------|---------------------------------------------|------------------------------|-----------------------------------------|
| Vertical Axis                         | 100                        | 1.9                                         | 0.15                         | 0.15                                    |
|                                       | 100                        | 0.95                                        | 3.5                          | 3.65                                    |
| Longitudinal Axis                     | 100                        | 1.5                                         | 0.09                         | 3.74                                    |
|                                       | 100                        | 0.75                                        | 6.7                          | 10.44                                   |
| Lateral Axis                          | 100                        | 1.5                                         | 0.09                         | 10.53                                   |
|                                       | 100                        | 0.75                                        | 6.7                          | 17.23                                   |
